# Supplementary figures and images for: E7080 (Lenvatinib), a Multi-Targeted Tyrosine Kinase Inhibitor, Demonstrates Antitumor Activities Against Colorectal Cancer Xenografts
Source: PubMed Central journal article supplement — Neoplasia. 2014 Nov 20;16(11):972–81. doi: 10.1016/j.neo.2014.09.008 (PMC4240916; doi:10.1016/j.neo.2014.09.008), 2014-11-20

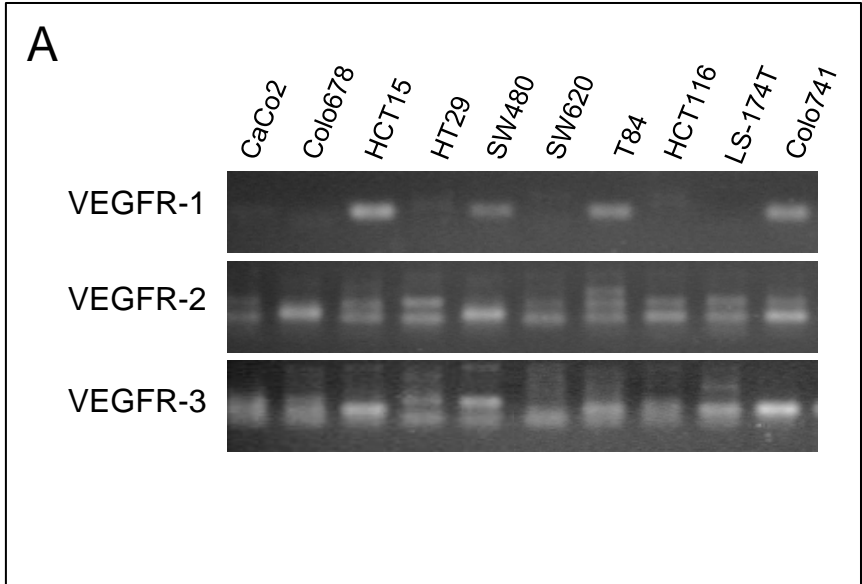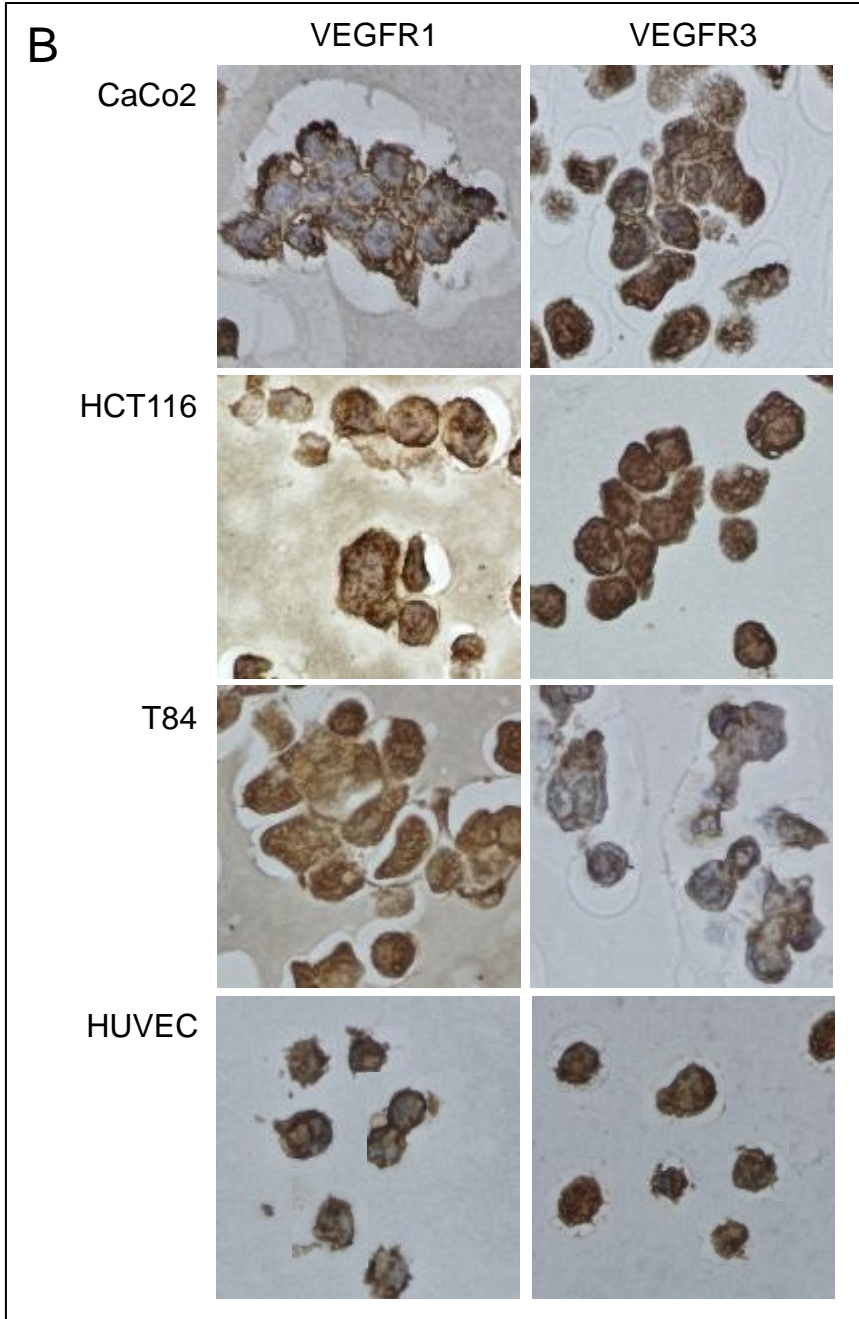

Supplementary Fig. 1

Supplement: mmc1.pdf [file mmc1.pdf]

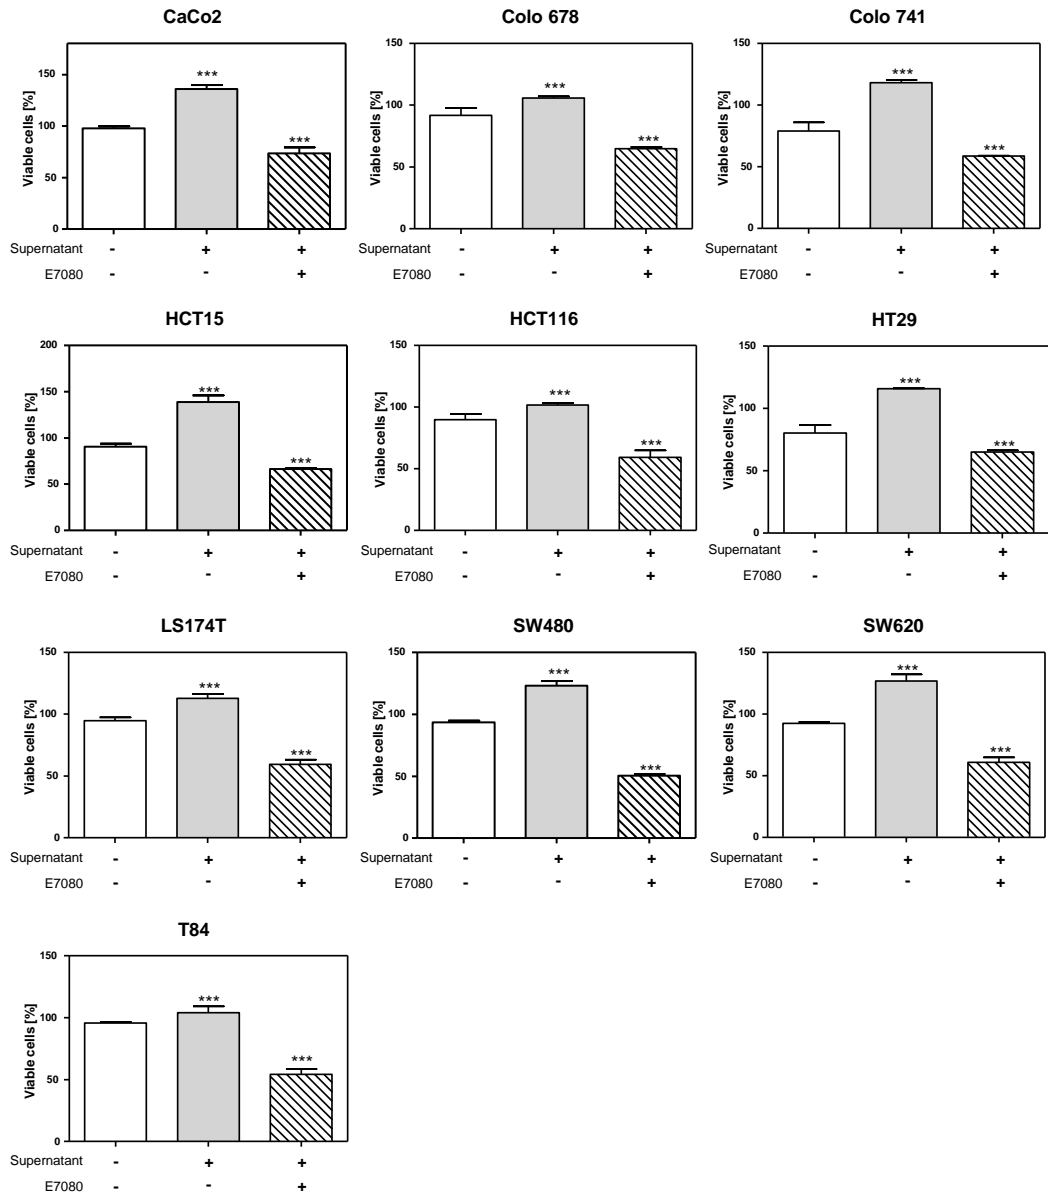

Supplementary Fig. 2

Supplement: mmc2.pdf [file mmc2.pdf]

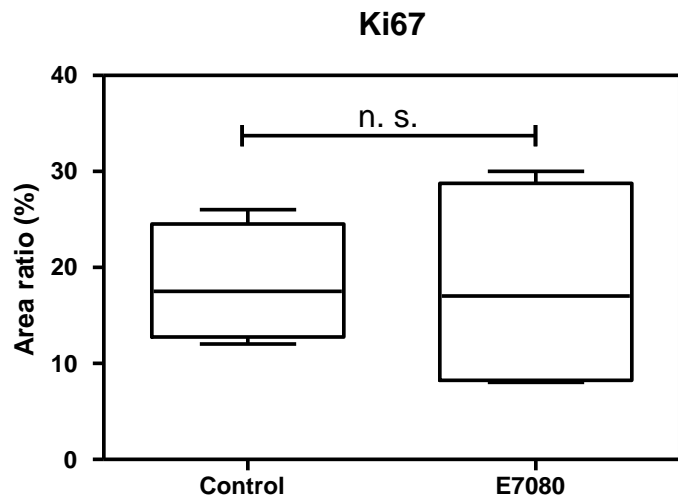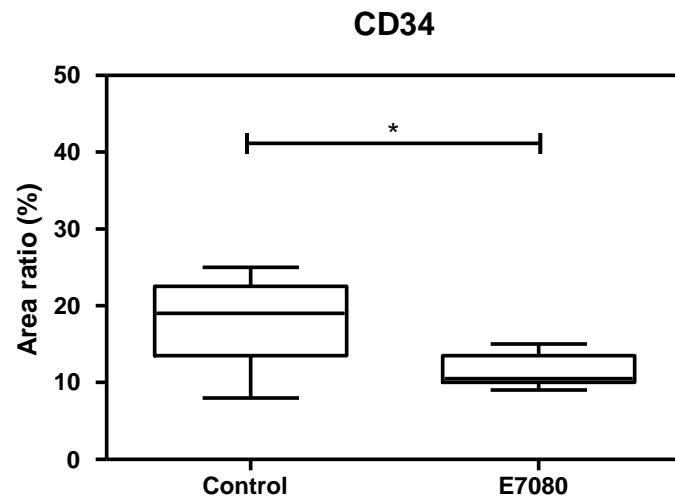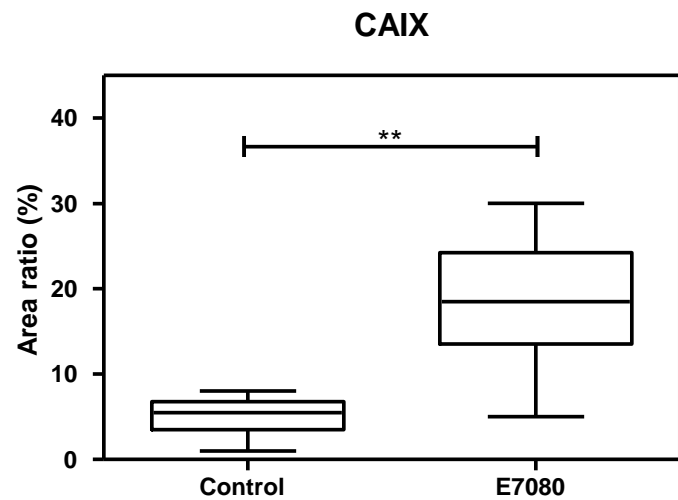

Supplement: mmc3.pdf [file mmc3.pdf]
